# Supplementary material for: Workplace Relations and Opportunities for Career Development Impact the Retention of Veterinarians in Shelter Medicine
Source: PubMed Central journal article supplement (PMC8424191; doi:10.3389/fvets.2021.732105), 2021-08-25
Supplement: Data_Sheet_1.pdf [file Data_Sheet_1.pdf]

*Survey preamble:* For the context of this survey, the terms “shelter” and “shelter medicine” refer to any job that is associated with the care of homeless animals or work in the community surrounding at-risk populations. This includes veterinarian roles in animal shelters, low-cost clinics and spay/neuter clinics.

1. What is your gender?

- Male
- Female
- Other (open answer)

2. What is your age?

- 20-29
- 30-39
- 40-49
- 49 and older

3. What is your race?

- American Indian/Alaskan Native
- Native Hawaiian/Pacific Islander
- Asian
- Black or African American
- Hispanic or Latino
- White
- Mixed race
- Prefer not to answer
- Unknown

4. What is your current salary before taxes?

- <\$50,000
- \$50,000-\$99,999
- \$100,000-\$149,999
- \$150,000-\$199,999
- ≥\$200,000
- Prefer not to answer

① *If you are contracted on an hourly basis, please provide an estimate of your yearly salary.*

5. a) What is your current outstanding student loan debt? (drop-down menu)

b) What was your outstanding student loan debt when you graduated from veterinary school?

(Drop down menu)

- None
- <\$50,000
- \$50,000-\$99,999
- \$100,000-\$149,999
- \$150,000-\$199,999
- \$200,000-\$249,999

- \$250,000-\$299,999
- \$300,000-\$349,999
- \$350,000-\$399,999
- \$400,000-\$449,999
- \$450,000-\$499,999
- ≥\$500,000
- Prefer not to answer

6. What year did you obtain your veterinary degree? (Open answer)

7. What school did you obtain your veterinary degree from? (Drop down menu)

- Auburn University, Alabama
- Tuskegee University, Alabama
- Midwestern University, Arizona
- Murdoch University, Australia
- University of Melbourne, Australia
- University of Queensland, Australia
- University of Sydney, Australia
- University of California, California
- Western University of Health Sciences, California
- University of Calgary, Canada
- University of Guelph, Canada
- Université de Montréal, Quebec, Canada
- University of Prince Edward Island, Canada
- University of Saskatchewan, Saskatchewan, Canada
- Colorado State University, Colorado
- VetAgro Sup, France
- University of Florida, Florida
- University of Georgia, Georgia
- University of Illinois, Illinois
- Purdue University, Indiana
- Iowa State University, Iowa
- University College Dublin, Ireland
- Kansas State University, Kansas
- Seoul National University, Korea
- Louisiana State University, Louisiana
- Tufts University, Massachusetts
- Universidad Nacional Autonoma de México, Mexico
- Michigan State University, Michigan
- University of Minnesota, Minnesota
- Mississippi State University, Mississippi
- University of Missouri-Columbia, Missouri
- Cornell University, New York
- Long Island University, New York
- State University of Utrecht, The Netherlands
- Massey University College of Sciences, New Zealand

- North Carolina State University, North Carolina
- The Ohio State University, Ohio
- Oklahoma State University, Oklahoma
- Oregon State University, Oregon
- University of Pennsylvania, Pennsylvania
- University of Edinburgh, Scotland
- University of Glasgow, Scotland
- University of Tennessee, Tennessee
- Lincoln Memorial University, Tennessee
- Texas A&M University, Texas
- University of Bristol, United Kingdom
- University of London, United Kingdom
- Virginia Tech, Virginia
- Washington State University, Washington
- University of Wisconsin-Madison, Wisconsin
- Ross University, West Indies
- St George's University, West Indies
- Other (open answer - please specify)

8. Have you completed further education in addition to your veterinary degree? (Select all that apply)

- Master's
- Master of Public Health/Master of Preventive Veterinary Medicine
- PhD
- Board certification
- Internship training program
- Residency training program
- Other
- None

9. Are you currently completing, or do you intend to complete further education in addition to your veterinary degree? (Select all that apply)

- Master's
- Master of Public Health/Master of Preventive Veterinary Medicine
- PhD
- Board certification
- Internship training program
- Residency training program
- Other
- None

10. In what state or territory is your current primary employment? (Drop down menu including all states and territories and an option for 'Outside US' with open answer)

11. What field of veterinary medicine is your current primary employment?

- Small animal

- Mixed practice
- Large animal
- Shelter medicine
- Equine
- Academia
- Government
- Exotics
- Laboratory animal
- Research
- Regulatory/Policy
- Zoo
- Other

① *Mixed practice includes at least 25% companion animal and at least 25% large animal or equine.*

12. On what basis are you currently employed at your primary employment setting?

- Full time
- Part-time (<35 hrs/week)
- Casual
- Volunteer
- Other

*Skip logic:* if the participant indicated they currently work in “shelter medicine” in question 11, they skip to Stream A. If the participant indicated they do not currently work in shelter medicine in question 11, they are directed to question 13.

13. Have you ever been employed in the shelter medicine field?

- Yes
- No

*Skip logic:* if the participant answered ‘yes’ in question 13, they are directed to Stream B. If the participant answered ‘no’, they are directed to Stream C.

### **Stream A – Currently employed in shelter medicine**

14. How long have you been employed as a veterinarian in the shelter medicine field?

- Less than 1 year
- 1-2 years
- 3-5 years
- 5-10 years
- 11-20 years
- More than 20 years

15. Overall, how satisfied are you with your current job in shelter medicine?

|                   |                       |                                    |                    |                |
|-------------------|-----------------------|------------------------------------|--------------------|----------------|
| 1                 | 2                     | 3                                  | 4                  | 5              |
| Very dissatisfied | Somewhat dissatisfied | Neither satisfied nor dissatisfied | Somewhat satisfied | Very satisfied |

16. Please select all of the duties that you are required to perform as part of your job in shelter medicine. (Select all that apply)

- Spay/neuter
- Pediatric spay/neuter
- Other surgery
- Population management
- Humane euthanasia
- Euthanasia decision making process
- Administrative responsibilities
- Physical exams
- Treatment decisions
- Adopt-ability decisions
- Behavior evaluation
- Development of health care policies and/or standard operating procedures
- On call/emergency duties
- Weekend hours
- Forensics/cruelty investigation
- Testify in court
- Performing laboratory procedures (fecal, blood smears, cytology, skin scrapes, etc.) in house
- Development/fund raising
- Humane education
- Community education
- Community outreach clinics (e.g., microchip, vaccination drives)
- Access to care veterinary clinics
- Emergency preparedness planning
- Staff training
- Staff supervision

17. How much do the following aspects of work in shelter medicine appeal to you?

|                                  | 1<br>Very unappealing | 2<br>Somewhat unappealing | 3<br>Neither appealing nor unappealing | 4<br>Somewhat appealing | 5<br>Very appealing |
|----------------------------------|-----------------------|---------------------------|----------------------------------------|-------------------------|---------------------|
| Performing spay/neuter           |                       |                           |                                        |                         |                     |
| Performing pediatric spay/neuter |                       |                           |                                        |                         |                     |

Performing other surgery

Managing populations

Performing humane euthanasia

Making euthanasia decisions

Performing administrative responsibilities

Performing physical exams

Making treatment decisions

Making adopt-ability decisions

Evaluating behavior

Developing health care policies and/or standard operating procedures

Being on call for emergencies

Working on weekends

Performing forensics/cruelty investigations

Testifying in court

Performing laboratory procedures (fecal, blood smears, cytology, skin scrapes, etc.) in house

Participating in development/fund raising

Providing humane education

Providing community education

|                                                                                   |  |  |  |  |  |
|-----------------------------------------------------------------------------------|--|--|--|--|--|
| Participating in community outreach clinics (e.g., microchip, vaccination drives) |  |  |  |  |  |
| Participating in access to care community clinics                                 |  |  |  |  |  |
| Developing emergency preparedness plans                                           |  |  |  |  |  |
| Training staff                                                                    |  |  |  |  |  |
| Supervising staff                                                                 |  |  |  |  |  |

18. How much do the following factors discourage or encourage you to continue working in the shelter medicine field?

N.B. Below options will be presented in a randomized order in Qualtrics.

|                                                                       | <b>1</b><br>Strongly discourage | <b>2</b><br>Somewhat discourage | <b>3</b><br>No influence | <b>4</b><br>Somewhat encourage | <b>5</b><br>Strongly encourage |
|-----------------------------------------------------------------------|---------------------------------|---------------------------------|--------------------------|--------------------------------|--------------------------------|
| Salary expectations                                                   |                                 |                                 |                          |                                |                                |
| Ability to access employee benefits, e.g., health insurance           |                                 |                                 |                          |                                |                                |
| Ability to access loan forgiveness program                            |                                 |                                 |                          |                                |                                |
| Regularity of work hours                                              |                                 |                                 |                          |                                |                                |
| Number of work hours                                                  |                                 |                                 |                          |                                |                                |
| Workload                                                              |                                 |                                 |                          |                                |                                |
| Ability to promote animal welfare                                     |                                 |                                 |                          |                                |                                |
| Ability to provide community service                                  |                                 |                                 |                          |                                |                                |
| Opportunities for career development                                  |                                 |                                 |                          |                                |                                |
| The perception of shelter medicine among other veterinary disciplines |                                 |                                 |                          |                                |                                |
| Ability to find a suitable internship or residency                    |                                 |                                 |                          |                                |                                |
| Ability to find suitable shelter veterinarian jobs                    |                                 |                                 |                          |                                |                                |

|                                                               |  |  |  |  |  |
|---------------------------------------------------------------|--|--|--|--|--|
| Location of shelters                                          |  |  |  |  |  |
| Opportunity to educate and interact with pet owners           |  |  |  |  |  |
| Ability to perform duties without interacting with pet owners |  |  |  |  |  |
| Strong emphasis on shelter live release rates                 |  |  |  |  |  |
| Risk of compassion fatigue, burnout or occupational stress    |  |  |  |  |  |
| Confidence in performing shelter medicine procedures          |  |  |  |  |  |
| Organizational policies and procedures                        |  |  |  |  |  |
| Interactions with administrative staff                        |  |  |  |  |  |
| Availability of mentorship                                    |  |  |  |  |  |
| Ability to be part of a multiple veterinarian team            |  |  |  |  |  |
| Interactions with shelter veterinarians or veterinary staff   |  |  |  |  |  |

19. Are there any additional reasons not described above that you chose to work in shelter medicine?

- Yes
- No

If answered yes, please describe the additional reasons that you chose to work in shelter medicine. (Open answer)

20. Are there any additional reasons not described above that you have considered leaving shelter medicine?

- Yes
- No

If answered yes, please describe the additional reasons that you have considered leaving shelter medicine. (Open answer)

21. If you could change the number of hours you work per week, would you:

- Work more hours per week for a higher level of total compensation
- Work fewer hours per week for a lower level of total compensation



- Work the same number of hours per week with no change to your current compensation.

22. Answer the following questions regarding the social aspects of your professional life.

|                                                             | <b>1</b><br>Hardly ever | <b>2</b><br>Some of the<br>time | <b>3</b><br>Often |
|-------------------------------------------------------------|-------------------------|---------------------------------|-------------------|
| At work, how often do you feel that you lack companionship? |                         |                                 |                   |
| At work, how often do you feel left out?                    |                         |                                 |                   |
| At work, how often do you feel isolated from others?        |                         |                                 |                   |

23. Consider the following statements regarding your professional fulfilment.

|                                                                | <b>1</b><br>Not at all<br>true | <b>2</b><br>Somewhat<br>true | <b>3</b><br>Moderately<br>true | <b>4</b><br>Very true | <b>5</b><br>Completely<br>true |
|----------------------------------------------------------------|--------------------------------|------------------------------|--------------------------------|-----------------------|--------------------------------|
| I feel happy at work                                           |                                |                              |                                |                       |                                |
| I feel worthwhile at work                                      |                                |                              |                                |                       |                                |
| My work is satisfying to me                                    |                                |                              |                                |                       |                                |
| I feel in control when dealing with difficult problems at work |                                |                              |                                |                       |                                |
| My work is meaningful to me                                    |                                |                              |                                |                       |                                |
| I'm contributing professionally in the ways I value most       |                                |                              |                                |                       |                                |

**Stream B – Previously employed in shelter medicine**

24. In what capacity did you work as a veterinarian in shelter medicine?

- Full time
- Part-time (<35 hrs/week)
- Casual
- Volunteer
- Other

25. How long were you employed as a veterinarian in the shelter medicine field?

- Less than 1 year
- 1-2 years
- 3-5 years
- 5-10 years
- 11-20 years
- More than 20 years

26. When did you leave the shelter medicine field?

- Less than 1 year ago
- 1-2 years ago
- 3-5 years ago
- 5-10 years ago
- 11-20 years ago
- More than 20 years ago

27. How satisfied were you with your employment in the shelter medicine field?

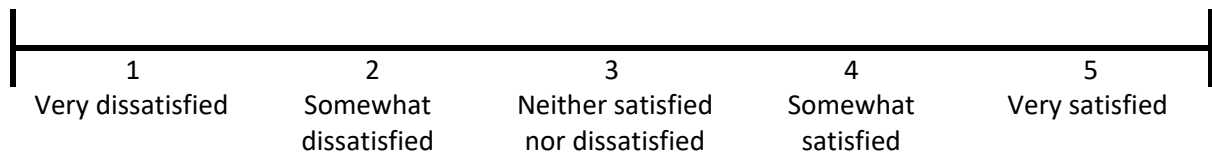

28. How likely are you to consider working in shelter medicine in the future?

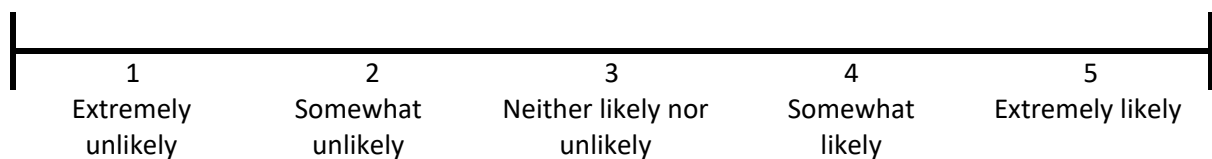

29. Please select all of the duties that you were required to perform as part of your job in shelter medicine. (Select all that apply)

- Spay/neuter
- Pediatric spay/neuter
- Other surgery
- Population management
- Humane euthanasia
- Euthanasia decision making process
- Administrative responsibilities

- Physical exams
- Treatment decisions
- Adopt-ability decisions
- Behavior evaluation
- Development of health care policies and/or standard operating procedures
- On call/emergency duties
- Weekend hours
- Forensics/cruelty investigation
- Testify in court
- Performing laboratory procedures (fecal, blood smears, cytology, skin scrapes, etc.) in house
- Development/fund raising
- Humane education
- Community education
- Community outreach clinics (e.g., microchip, vaccination drives)
- Access to care veterinary clinics
- Emergency preparedness planning
- Staff training
- Staff supervision

30. How much did the following aspects of work in shelter medicine appeal to you?

|                                                  | <b>1</b><br>Very<br>unappealing | <b>2</b><br>Somewhat<br>unappealing | <b>3</b><br>Neither<br>appealing nor<br>unappealing | <b>4</b><br>Somewhat<br>appealing | <b>5</b><br>Very<br>appealing |
|--------------------------------------------------|---------------------------------|-------------------------------------|-----------------------------------------------------|-----------------------------------|-------------------------------|
| Performing spay/neuter                           |                                 |                                     |                                                     |                                   |                               |
| Performing pediatric<br>spay/neuter              |                                 |                                     |                                                     |                                   |                               |
| Performing other<br>surgery                      |                                 |                                     |                                                     |                                   |                               |
| Managing populations                             |                                 |                                     |                                                     |                                   |                               |
| Performing humane<br>euthanasia                  |                                 |                                     |                                                     |                                   |                               |
| Making euthanasia<br>decisions                   |                                 |                                     |                                                     |                                   |                               |
| Performing<br>administrative<br>responsibilities |                                 |                                     |                                                     |                                   |                               |
| Performing physical<br>exams                     |                                 |                                     |                                                     |                                   |                               |
| Making treatment<br>decisions                    |                                 |                                     |                                                     |                                   |                               |

|                                                                                               |  |  |  |  |  |
|-----------------------------------------------------------------------------------------------|--|--|--|--|--|
| Making adopt-ability decisions                                                                |  |  |  |  |  |
| Evaluating behavior                                                                           |  |  |  |  |  |
| Developing health care policies and/or standard operating procedures                          |  |  |  |  |  |
| Being on call for emergencies                                                                 |  |  |  |  |  |
| Working on weekends                                                                           |  |  |  |  |  |
| Performing forensics/cruelty investigations                                                   |  |  |  |  |  |
| Testifying in court                                                                           |  |  |  |  |  |
| Performing laboratory procedures (fecal, blood smears, cytology, skin scrapes, etc.) in house |  |  |  |  |  |
| Participating in development/fund raising                                                     |  |  |  |  |  |
| Providing humane education                                                                    |  |  |  |  |  |
| Providing community education                                                                 |  |  |  |  |  |
| Participating in community outreach clinics (e.g., microchip, vaccination drives)             |  |  |  |  |  |
| Participating in access to care community clinics                                             |  |  |  |  |  |
| Developing emergency preparedness plans                                                       |  |  |  |  |  |
| Training staff                                                                                |  |  |  |  |  |
| Supervising staff                                                                             |  |  |  |  |  |

31. How much did the following factors encourage or discourage you from working in the shelter medicine field?

N.B. Below options will be presented in a randomized order in Qualtrics.

|                                                                       | <b>1</b><br>Strongly<br>discourage | <b>2</b><br>Somewhat<br>discourage | <b>3</b><br>No<br>influence | <b>4</b><br>Somewhat<br>encourage | <b>5</b><br>Strongly<br>encourage |
|-----------------------------------------------------------------------|------------------------------------|------------------------------------|-----------------------------|-----------------------------------|-----------------------------------|
| Salary expectations                                                   |                                    |                                    |                             |                                   |                                   |
| Ability to access employee benefits, e.g., health insurance           |                                    |                                    |                             |                                   |                                   |
| Ability to access loan forgiveness program                            |                                    |                                    |                             |                                   |                                   |
| Regularity of work hours                                              |                                    |                                    |                             |                                   |                                   |
| Number of work hours                                                  |                                    |                                    |                             |                                   |                                   |
| Workload                                                              |                                    |                                    |                             |                                   |                                   |
| Ability to promote animal welfare                                     |                                    |                                    |                             |                                   |                                   |
| Ability to provide community service                                  |                                    |                                    |                             |                                   |                                   |
| Opportunities for career development                                  |                                    |                                    |                             |                                   |                                   |
| The perception of shelter medicine among other veterinary disciplines |                                    |                                    |                             |                                   |                                   |
| Ability to find a suitable internship or residency                    |                                    |                                    |                             |                                   |                                   |
| Ability to find suitable shelter veterinarian jobs                    |                                    |                                    |                             |                                   |                                   |
| Location of shelters                                                  |                                    |                                    |                             |                                   |                                   |
| Opportunity to educate and interact with pet owners                   |                                    |                                    |                             |                                   |                                   |
| Ability to perform duties without interacting with pet owners         |                                    |                                    |                             |                                   |                                   |
| Strong emphasis on shelter live release rates                         |                                    |                                    |                             |                                   |                                   |
| Risk of compassion fatigue, burnout or occupational stress            |                                    |                                    |                             |                                   |                                   |
| Confidence in performing shelter medicine procedures                  |                                    |                                    |                             |                                   |                                   |
| Organizational policies and procedures                                |                                    |                                    |                             |                                   |                                   |

|                                                             |  |  |  |  |  |
|-------------------------------------------------------------|--|--|--|--|--|
| Interactions with administrative staff                      |  |  |  |  |  |
| Availability of mentorship                                  |  |  |  |  |  |
| Ability to be part of a multiple veterinarian team          |  |  |  |  |  |
| Interactions with shelter veterinarians or veterinary staff |  |  |  |  |  |

32. Are there any additional reasons not described above that you chose to work in shelter medicine?

- Yes
- No

If answered yes, please describe the additional reasons that you chose to work in shelter medicine. (Open answer)

33. Are there any additional reasons not described above that you chose to leave shelter medicine?

- Yes
- No

If answered yes, please describe the additional reasons that you chose to leave shelter medicine. (Open answer)

34. Considering your previous job in shelter medicine, if you could have changed the number of hours you worked per week, would you have:

- Worked more hours per week for a higher level of total compensation
- Worked fewer hours per week for a lower level of total compensation
- Worked the same number of hours per week with no change to your compensation.

35. Answer the following questions regarding the social aspects of your previous job in shelter medicine.

|                                                                | <b>1</b><br>Hardly ever | <b>2</b><br>Some of the time | <b>3</b><br>Often |
|----------------------------------------------------------------|-------------------------|------------------------------|-------------------|
| At work, how often did you feel that you lacked companionship? |                         |                              |                   |
| At work, how often did you feel left out?                      |                         |                              |                   |
| At work, how often did you feel isolated from others?          |                         |                              |                   |

36. Consider the following statements regarding your professional fulfillment in your previous job in shelter medicine.

|                                                                   | <b>1</b><br>Not at all<br>true | <b>2</b><br>Somewhat<br>true | <b>3</b><br>Moderately<br>true | <b>4</b><br>Very true | <b>5</b><br>Completely<br>true |
|-------------------------------------------------------------------|--------------------------------|------------------------------|--------------------------------|-----------------------|--------------------------------|
| I felt happy at work                                              |                                |                              |                                |                       |                                |
| I felt worthwhile at work                                         |                                |                              |                                |                       |                                |
| My work was satisfying to me                                      |                                |                              |                                |                       |                                |
| I felt in control when dealing<br>with difficult problems at work |                                |                              |                                |                       |                                |
| My work was meaningful to me                                      |                                |                              |                                |                       |                                |
| I was contributing professionally<br>in the ways I valued most    |                                |                              |                                |                       |                                |

**Stream C – Never employed in shelter medicine**

37. How satisfied are you with your current employment?

|                   |                       |                                    |                    |                |
|-------------------|-----------------------|------------------------------------|--------------------|----------------|
| 1                 | 2                     | 3                                  | 4                  | 5              |
| Very dissatisfied | Somewhat dissatisfied | Neither satisfied nor dissatisfied | Somewhat satisfied | Very satisfied |

38. How likely are you to consider working in shelter medicine in the future?

|                    |                   |                             |                 |                  |
|--------------------|-------------------|-----------------------------|-----------------|------------------|
| 1                  | 2                 | 3                           | 4               | 5                |
| Extremely unlikely | Somewhat unlikely | Neither likely nor unlikely | Somewhat likely | Extremely likely |

39. How much do the following aspects of work in shelter medicine appeal to you?

|                                            | 1<br>Very unappealing | 2<br>Somewhat unappealing | 3<br>Neither appealing nor unappealing | 4<br>Somewhat appealing | 5<br>Very appealing |
|--------------------------------------------|-----------------------|---------------------------|----------------------------------------|-------------------------|---------------------|
| Performing spay/neuter                     |                       |                           |                                        |                         |                     |
| Performing pediatric spay/neuter           |                       |                           |                                        |                         |                     |
| Performing other surgery                   |                       |                           |                                        |                         |                     |
| Managing populations                       |                       |                           |                                        |                         |                     |
| Performing humane euthanasia               |                       |                           |                                        |                         |                     |
| Making euthanasia decisions                |                       |                           |                                        |                         |                     |
| Performing administrative responsibilities |                       |                           |                                        |                         |                     |
| Performing physical exams                  |                       |                           |                                        |                         |                     |
| Making treatment decisions                 |                       |                           |                                        |                         |                     |
| Making adopt-ability decisions             |                       |                           |                                        |                         |                     |
| Evaluating behavior                        |                       |                           |                                        |                         |                     |



|                                                                                               |  |  |  |  |  |
|-----------------------------------------------------------------------------------------------|--|--|--|--|--|
| Developing health care policies and/or standard operating procedures                          |  |  |  |  |  |
| Being on call for emergencies                                                                 |  |  |  |  |  |
| Working on weekends                                                                           |  |  |  |  |  |
| Performing forensics/cruelty investigations                                                   |  |  |  |  |  |
| Testifying in court                                                                           |  |  |  |  |  |
| Performing laboratory procedures (fecal, blood smears, cytology, skin scrapes, etc.) in house |  |  |  |  |  |
| Participating in development/fund raising                                                     |  |  |  |  |  |
| Providing humane education                                                                    |  |  |  |  |  |
| Providing community education                                                                 |  |  |  |  |  |
| Participating in community outreach clinics (e.g., microchip, vaccination drives)             |  |  |  |  |  |
| Participating in access to care community clinics                                             |  |  |  |  |  |
| Developing emergency preparedness plans                                                       |  |  |  |  |  |
| Training staff                                                                                |  |  |  |  |  |
| Supervising staff                                                                             |  |  |  |  |  |

40. How much would the following factors encourage or discourage you from working in the shelter medicine field?

N.B. Below options will be presented in a randomized order in Qualtrics.

|                     | <b>1</b><br>Strongly discourage | <b>2</b><br>Somewhat discourage | <b>3</b><br>No influence | <b>4</b><br>Somewhat encourage | <b>5</b><br>Strongly encourage |
|---------------------|---------------------------------|---------------------------------|--------------------------|--------------------------------|--------------------------------|
| Salary expectations |                                 |                                 |                          |                                |                                |

Ability to access employee benefits, e.g., health insurance

Ability to access loan forgiveness program

Regularity of work hours

Number of work hours

Workload

Ability to promote animal welfare

Ability to provide community service

Opportunities for career development

The perception of shelter medicine among other veterinary disciplines

Ability to find a suitable internship or residency

Ability to find suitable shelter veterinarian jobs

Location of shelters

Opportunity to educate and interact with pet owners

Ability to perform duties without interacting with pet owners

Strong emphasis on shelter live release rates

Risk of compassion fatigue, burnout or occupational stress

Confidence in performing shelter medicine procedures

Organizational policies and procedures

Interactions with administrative staff

Availability of mentorship

|                                                             |  |  |  |  |  |
|-------------------------------------------------------------|--|--|--|--|--|
| Ability to be part of a multiple veterinarian team          |  |  |  |  |  |
| Interactions with shelter veterinarians or veterinary staff |  |  |  |  |  |

41. Are there any additional reasons not described above that would motivate you to work in shelter medicine?

- Yes
- No

If answered yes, please describe the additional reasons that would motivate you to work in shelter medicine. (Open answer)

42. Are there any additional reasons not described above that you chose not to work in shelter medicine?

- Yes
- No

If answered yes, please describe the additional reasons that you chose not to work in shelter medicine. (Open answer)

43. If you could change the number of hours you work per week in your current job, would you:

- Work more hours per week for a higher level of total compensation
- Work fewer hours per week for a lower level of total compensation
- Work the same number of hours per week with no change to your current compensation.

44. Answer the following questions regarding the social aspects of your professional life.

|                                                             | <b>1</b><br>Hardly ever | <b>2</b><br>Some of the time | <b>3</b><br>Often |
|-------------------------------------------------------------|-------------------------|------------------------------|-------------------|
| At work, how often do you feel that you lack companionship? |                         |                              |                   |
| At work, how often do you feel left out?                    |                         |                              |                   |
| At work, how often do you feel isolated from others?        |                         |                              |                   |

45. Consider the following statements regarding your professional fulfillment.

|                           | <b>1</b><br>Not at all true | <b>2</b><br>Somewhat true | <b>3</b><br>Moderately true | <b>4</b><br>Very true | <b>5</b><br>Completely true |
|---------------------------|-----------------------------|---------------------------|-----------------------------|-----------------------|-----------------------------|
| I feel happy at work      |                             |                           |                             |                       |                             |
| I feel worthwhile at work |                             |                           |                             |                       |                             |

My work is satisfying to me

I feel in control when dealing  
with difficult problems at work

My work is meaningful to me

I'm contributing professionally in  
the ways I value most

|  |  |  |  |  |
|--|--|--|--|--|
|  |  |  |  |  |
|--|--|--|--|--|
